# Supplementary material for: Exploring the potential of anthracene derivatives as fluorescence emitters for biomedical applications
Source: Royal Society of Chemistry journal article supplement (doi:10.1039/d3tb00449j), 2023-01-01
Supplement: d3tb00449j1.pdf [file d3tb00449j1.pdf]

## Exploring the Potential of Anthracene Derivatives as Fluorescence Emitters for Biomedical Applications

Murat Aydemir,<sup>\*a</sup> Gülcin Haykir,<sup>b</sup> Harun Selvitopi,<sup>c</sup> Ozge Caglar Yildirim,<sup>d</sup> Mehmet Enes Arslan,<sup>d</sup> Bahattin Abay,<sup>e</sup> Figen Turksoy<sup>\*\*b</sup>

<sup>a</sup> Department of Fundamental Sciences, Faculty of Science, Erzurum Technical University, Erzurum, Turkey

<sup>b</sup> TUBITAK Marmara Research Center, Institute of Chemical Technology, p.b. 21, 41470, Gebze, Turkey

<sup>c</sup> Department of Mathematics, Faculty of Science, Erzurum Technical University, Erzurum, Turkey

<sup>d</sup> Department of Molecular Biology and Genetics, Faculty of Science, Erzurum Technical University, Erzurum, Turkey

<sup>e</sup> Department of Physics, Faculty of Science, Ataturk University, Erzurum, Turkey

### \*Correspondence:

Corresponding Authors: [murat.aydemir@erzurum.edu.tr](mailto:murat.aydemir@erzurum.edu.tr) ; [figen.turksoy@tubitak.gov.tr](mailto:figen.turksoy@tubitak.gov.tr)

**Keywords:** anthracene derivatives, triphenylamine groups, cyano groups, fluorescence emitters, biological properties

## Supplementary Material

### 1 Supplementary Data

#### Table Captions:

**Table 1** The physical and thermal properties of **7 & 8**

**Table 2** The electrochemical properties of **7 & 8**

#### Figure Captions:

**Scheme 1** The synthesis route used to prepare **7** & **8**

**Figure S1.** <sup>1</sup>H-NMR Spectrum of compound **4**

**Figure S2.** <sup>13</sup>C-NMR Spectrum of compound **4**

**Figure S3.** <sup>1</sup>H-NMR Spectrum of compound **5**

**Figure S4.** <sup>13</sup>C-NMR Spectrum of compound **5**

**Figure S5.** <sup>1</sup>H-NMR Spectrum of compound **7**

**Figure S6.** <sup>13</sup>C-NMR Spectrum of compound **7**

**Figure S7.** <sup>1</sup>H-NMR Spectrum of compound **8**

**Figure S8.** <sup>13</sup>C-NMR Spectrum of compound **8**

**Figure S9.** Thermal Gravimetric Analysis thermogram of compound **7**

**Figure S10.** Thermal Gravimetric Analysis thermogram of compound **8**

**Figure S11.** GC-MS chromatogram of compound **4**

**Figure S12.** GC-MS chromatogram of compound **5**

**Figure S13.** High Resolution Mass spectrum of compound **7**

**Figure S14.** High Resolution Mass spectrum of compound **8**

**Figure S15.** Electrochemical characterization of compound **7**

**Figure S16.** Electrochemical characterization of compound **8**

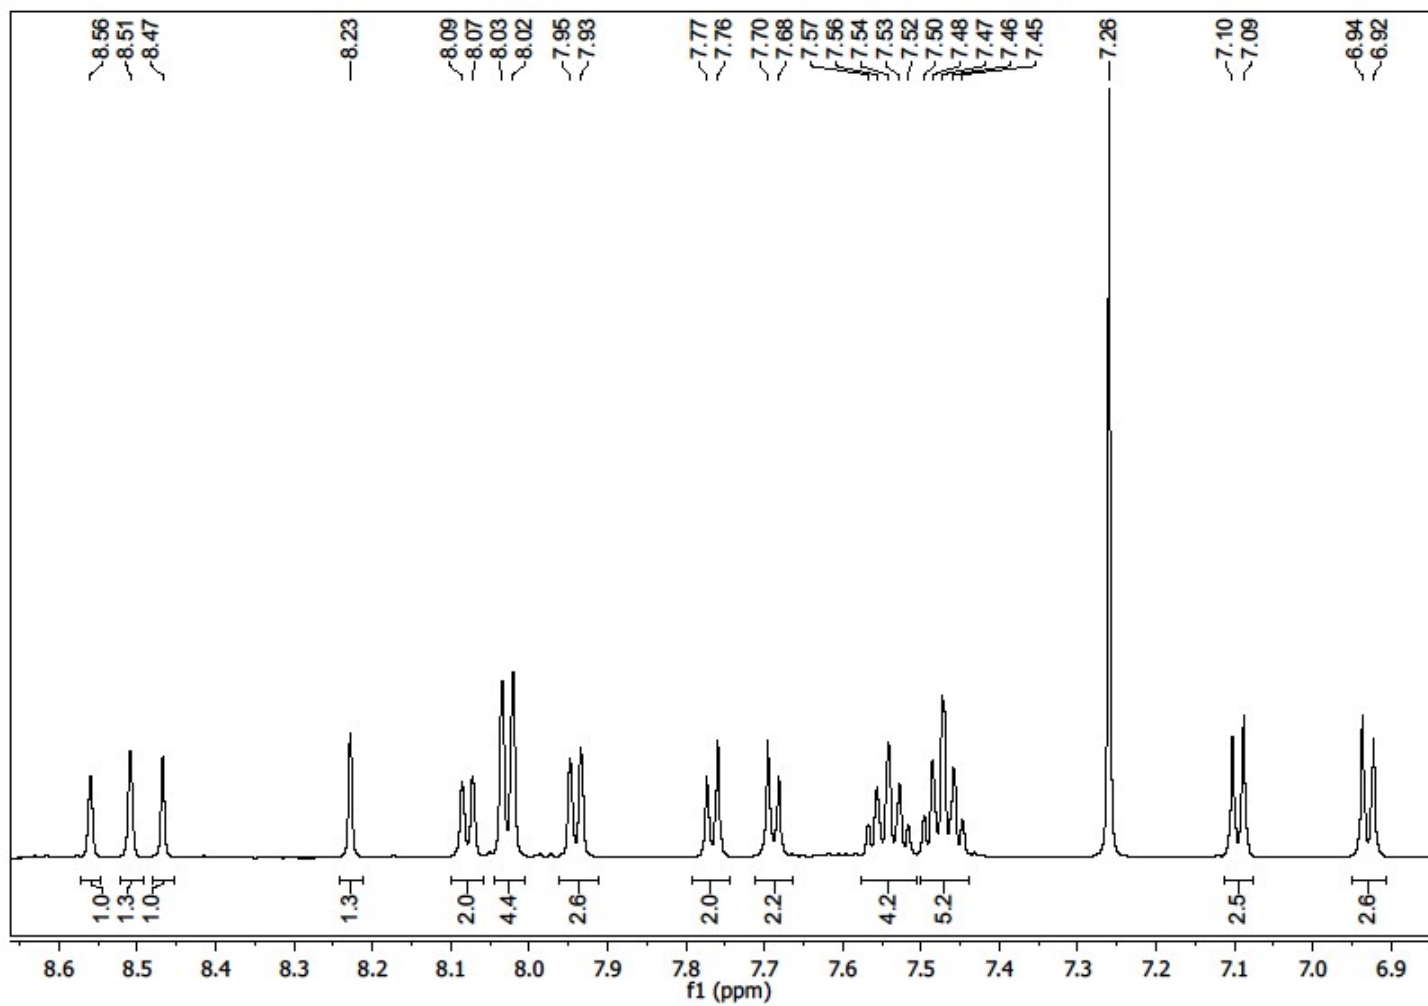

Figure S1. <sup>1</sup>H-NMR Spectrum of compound 4.

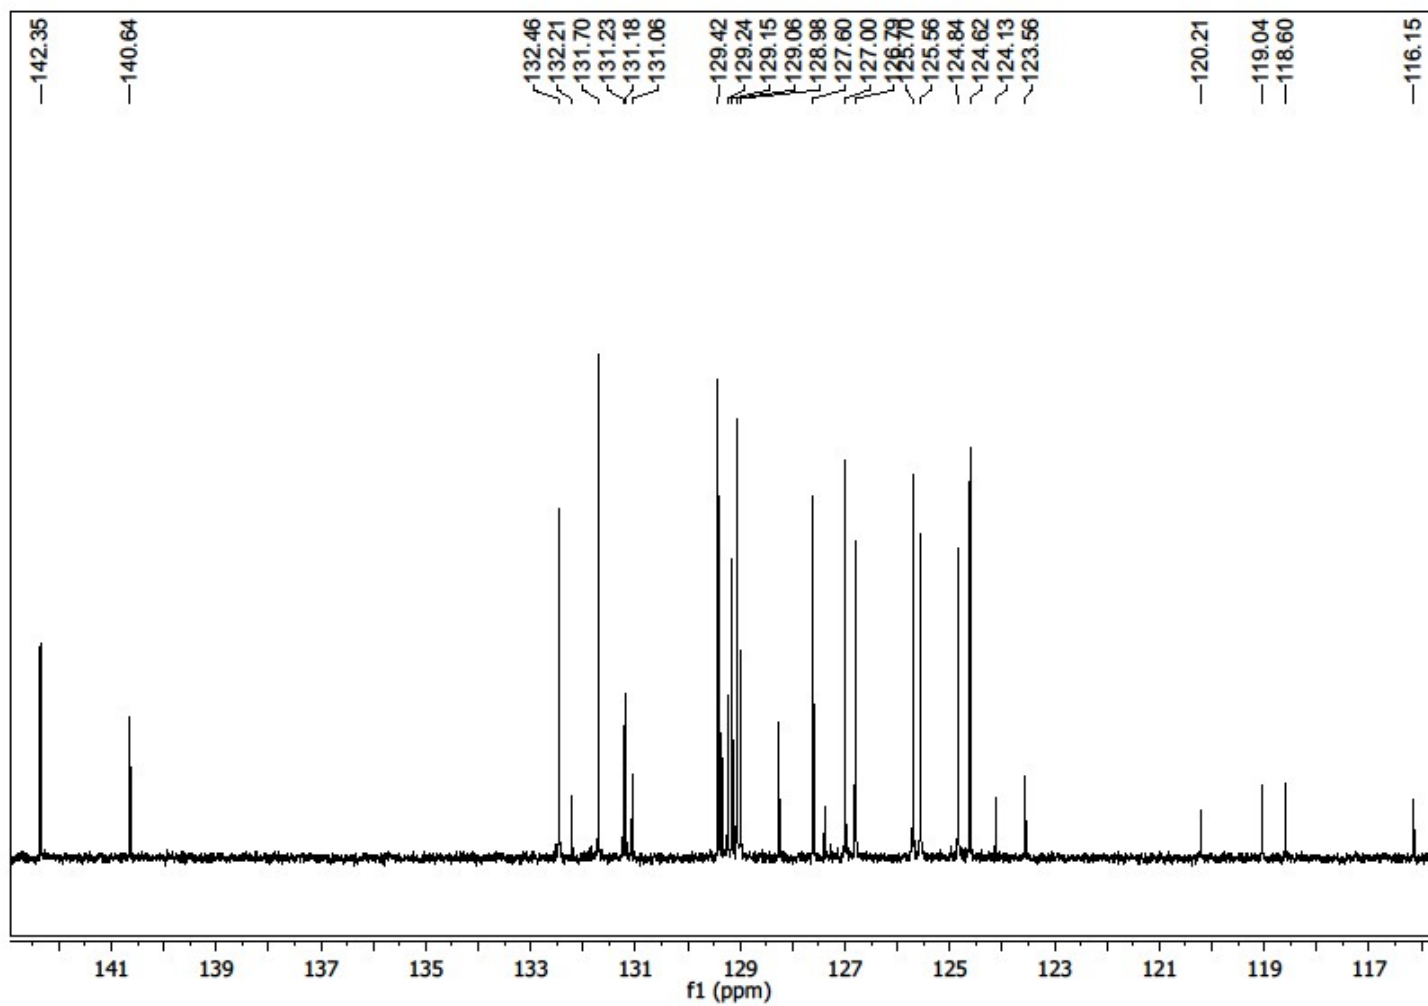

Figure S2. <sup>13</sup>C-NMR Spectrum of compound 4.

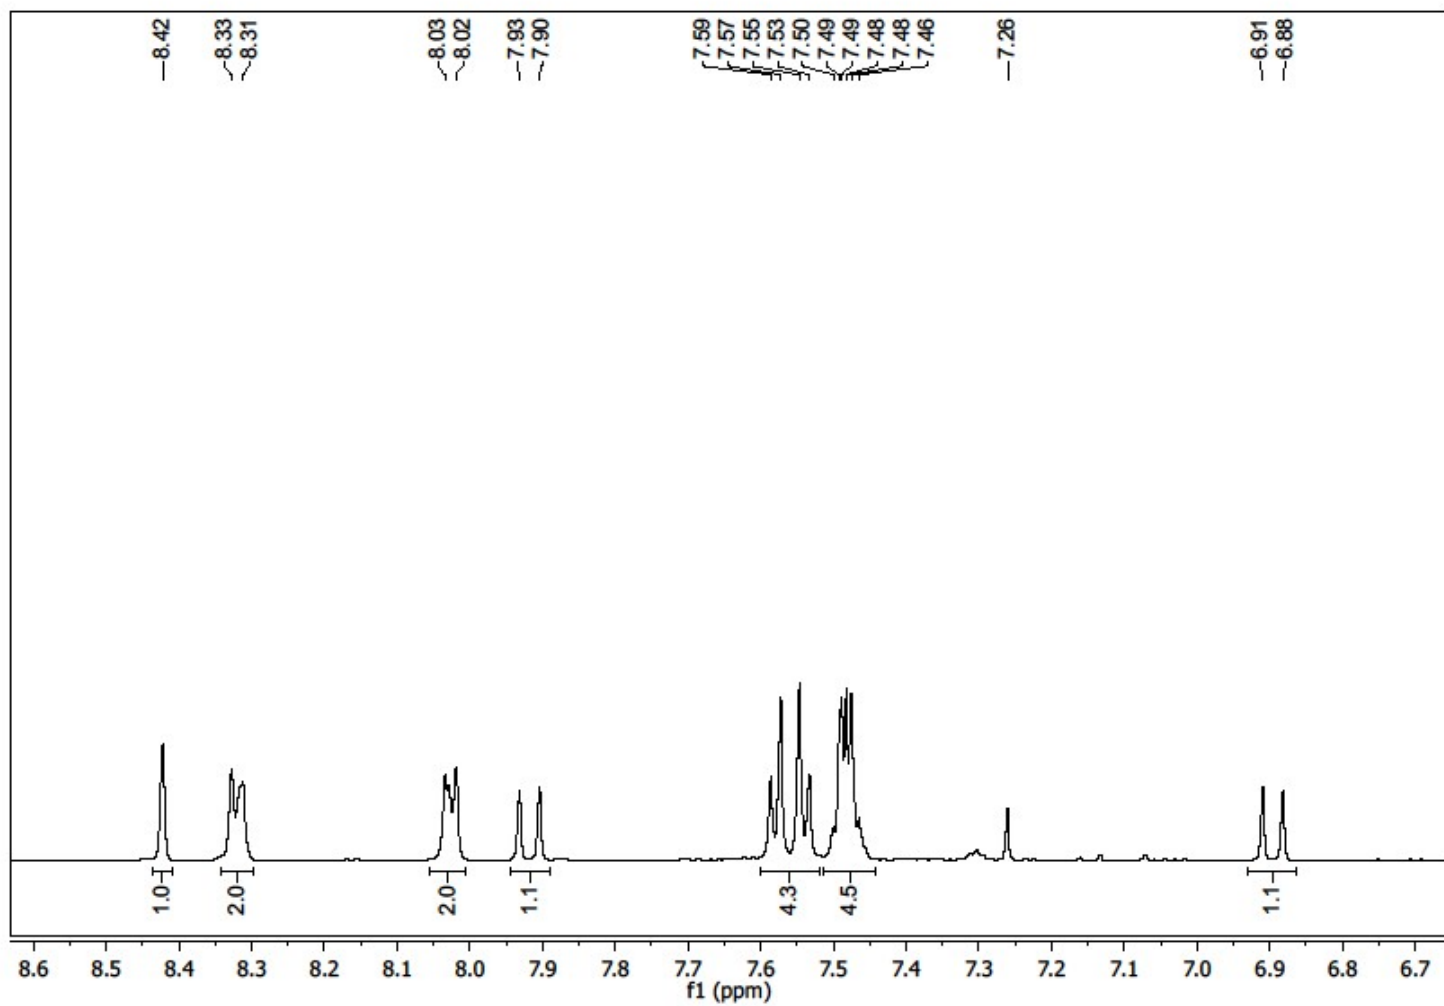

Figure S3. <sup>1</sup>H-NMR Spectrum of compound 5.

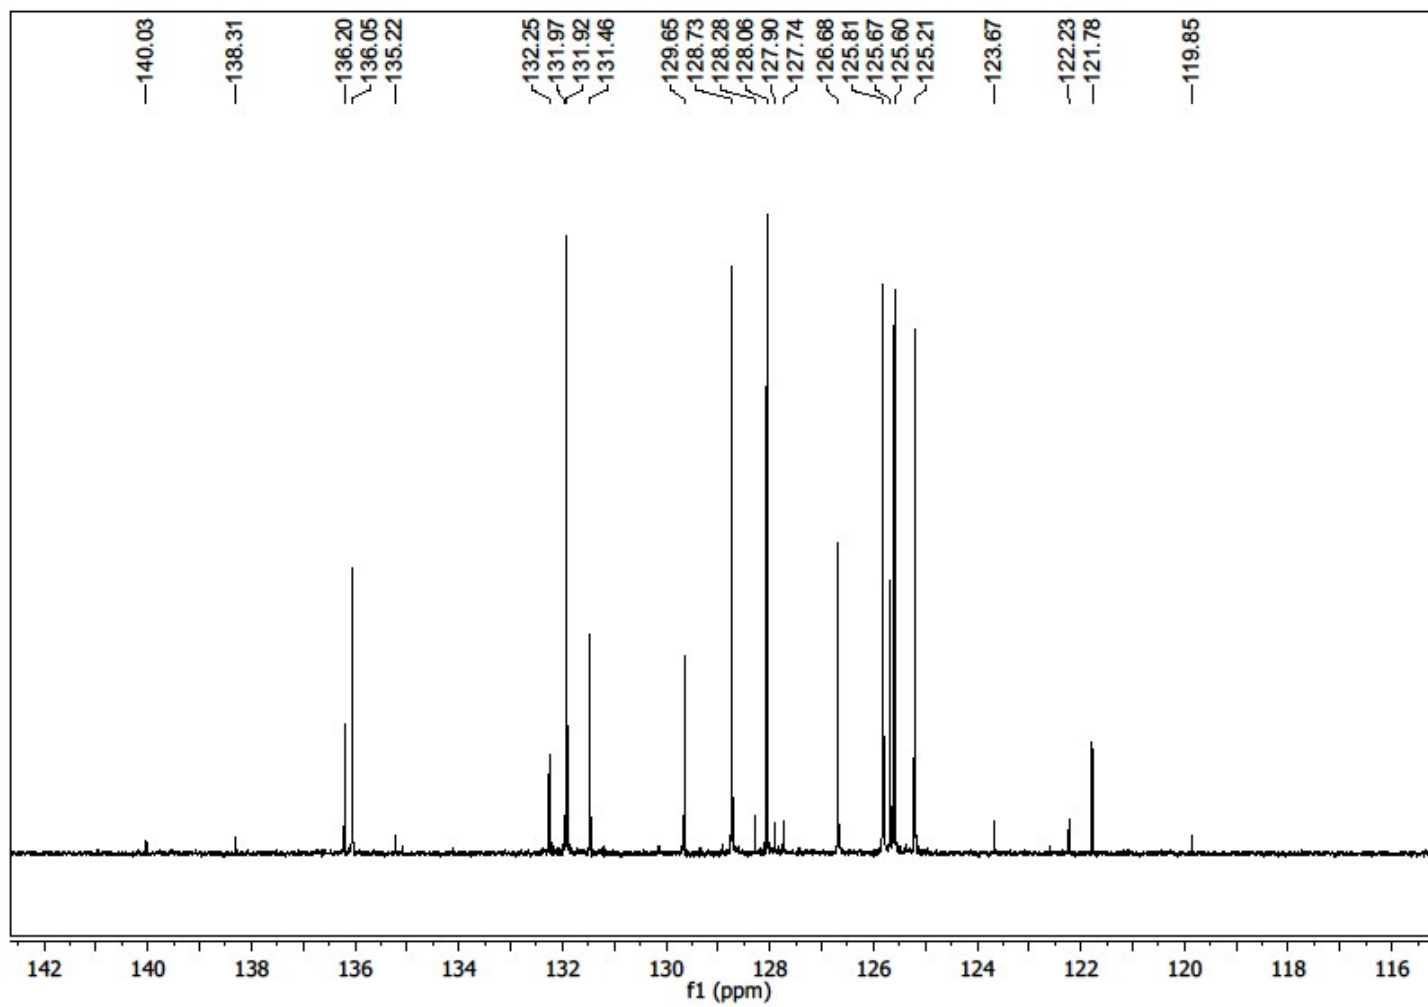

Figure S4. <sup>13</sup>C-NMR Spectrum of compound 5.

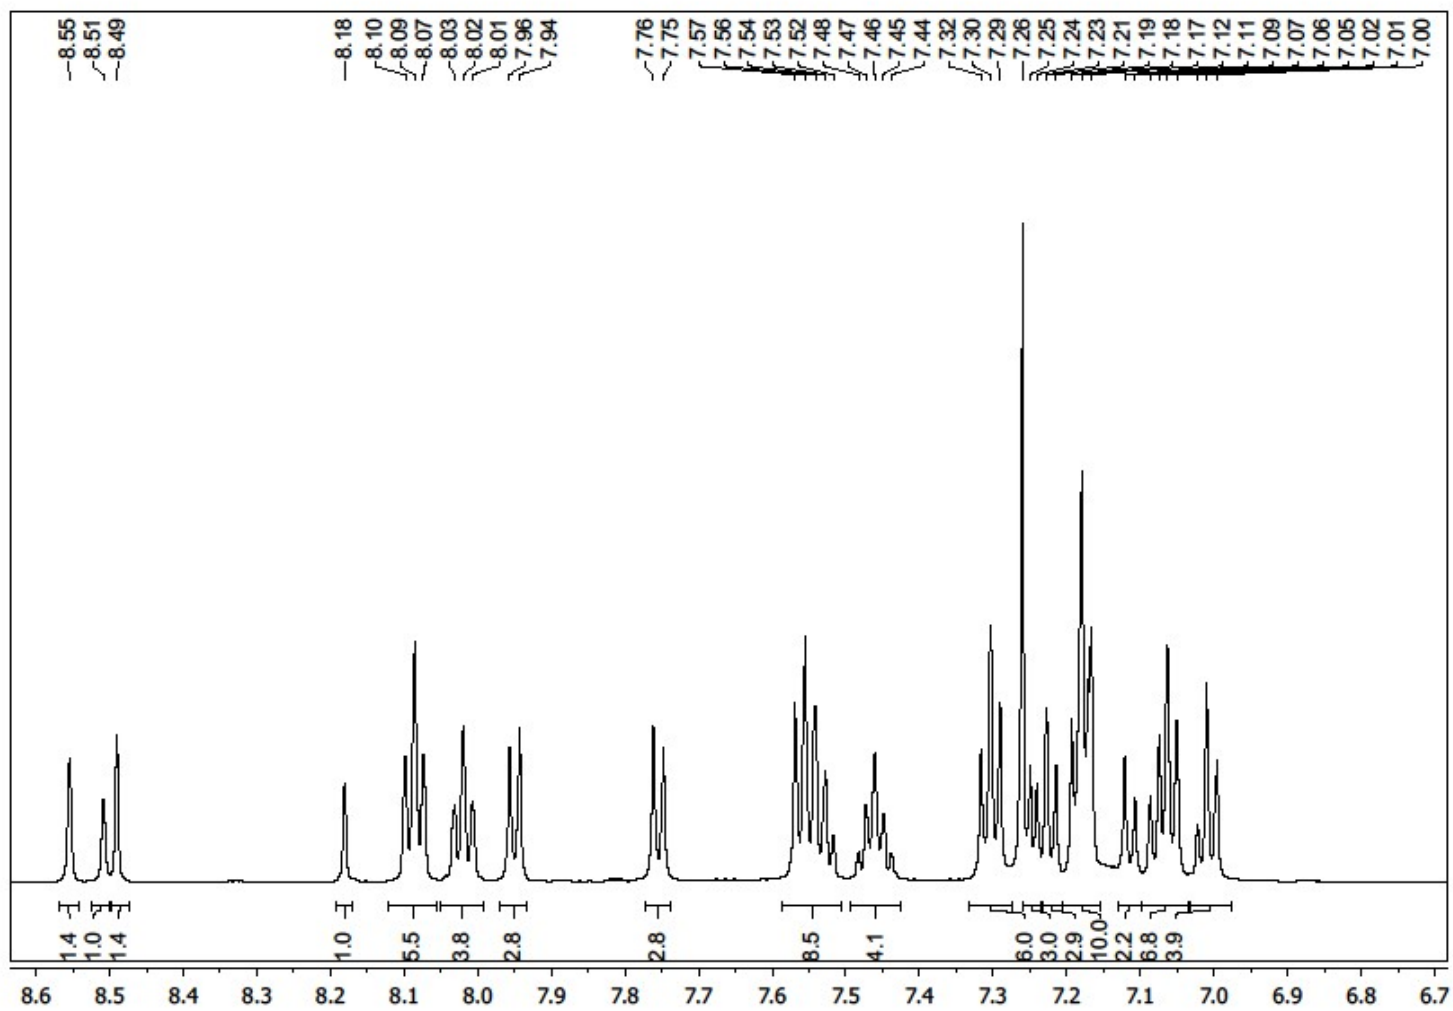

Figure S5. <sup>1</sup>H-NMR Spectrum of compound 7.

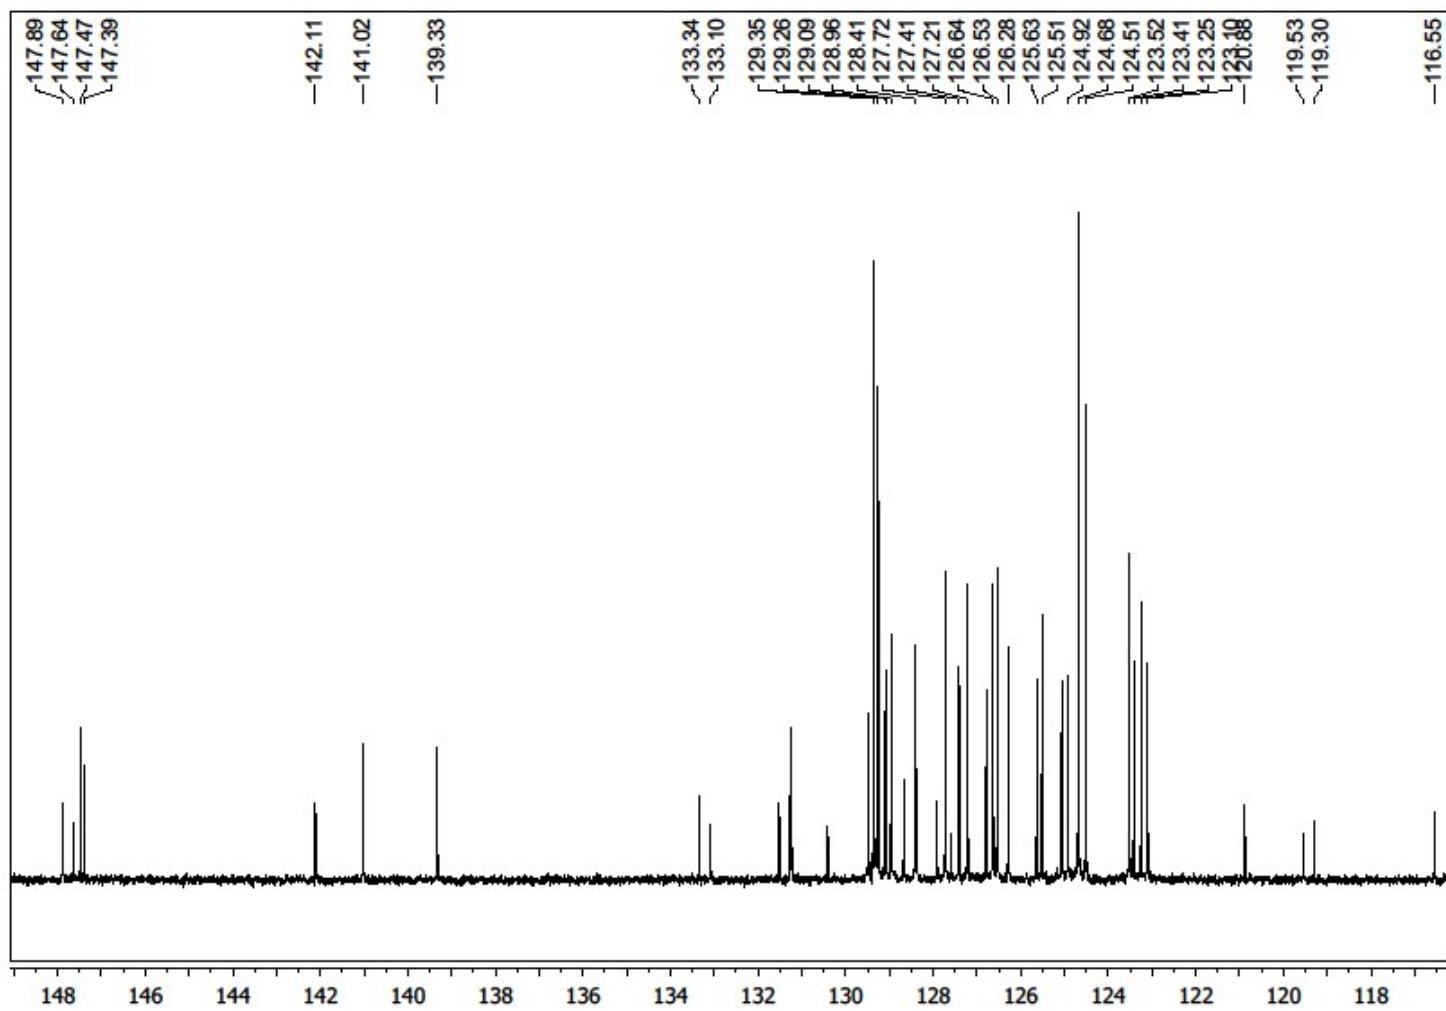

Figure S6.  $^{13}\text{C}$ -NMR Spectrum of compound 7.



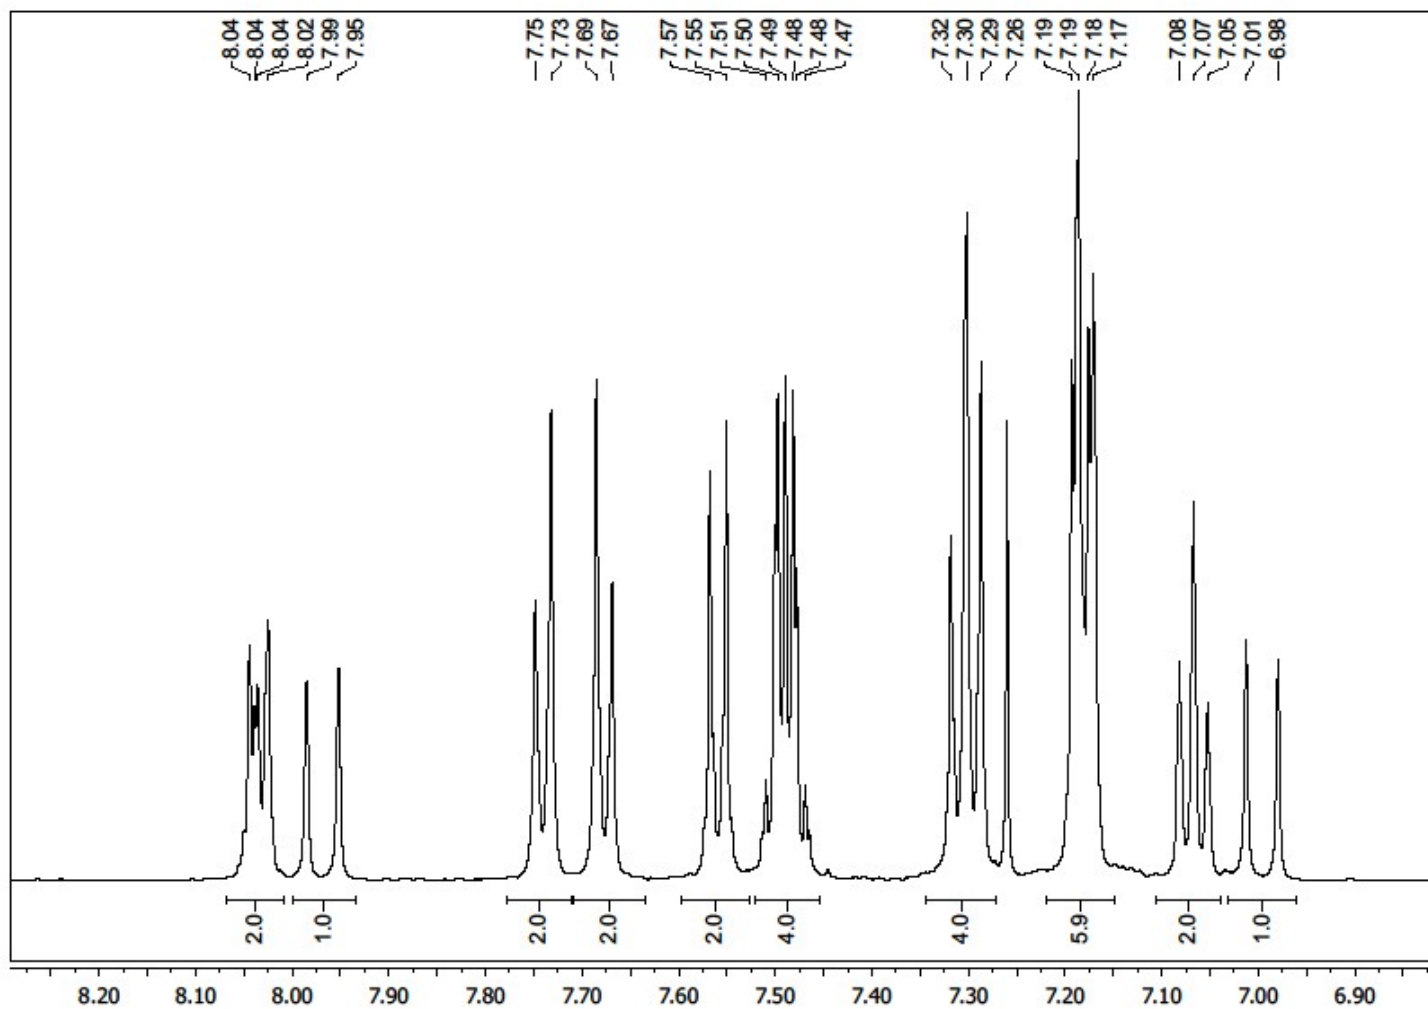

Figure S7. <sup>1</sup>H-NMR Spectrum of compound 8.

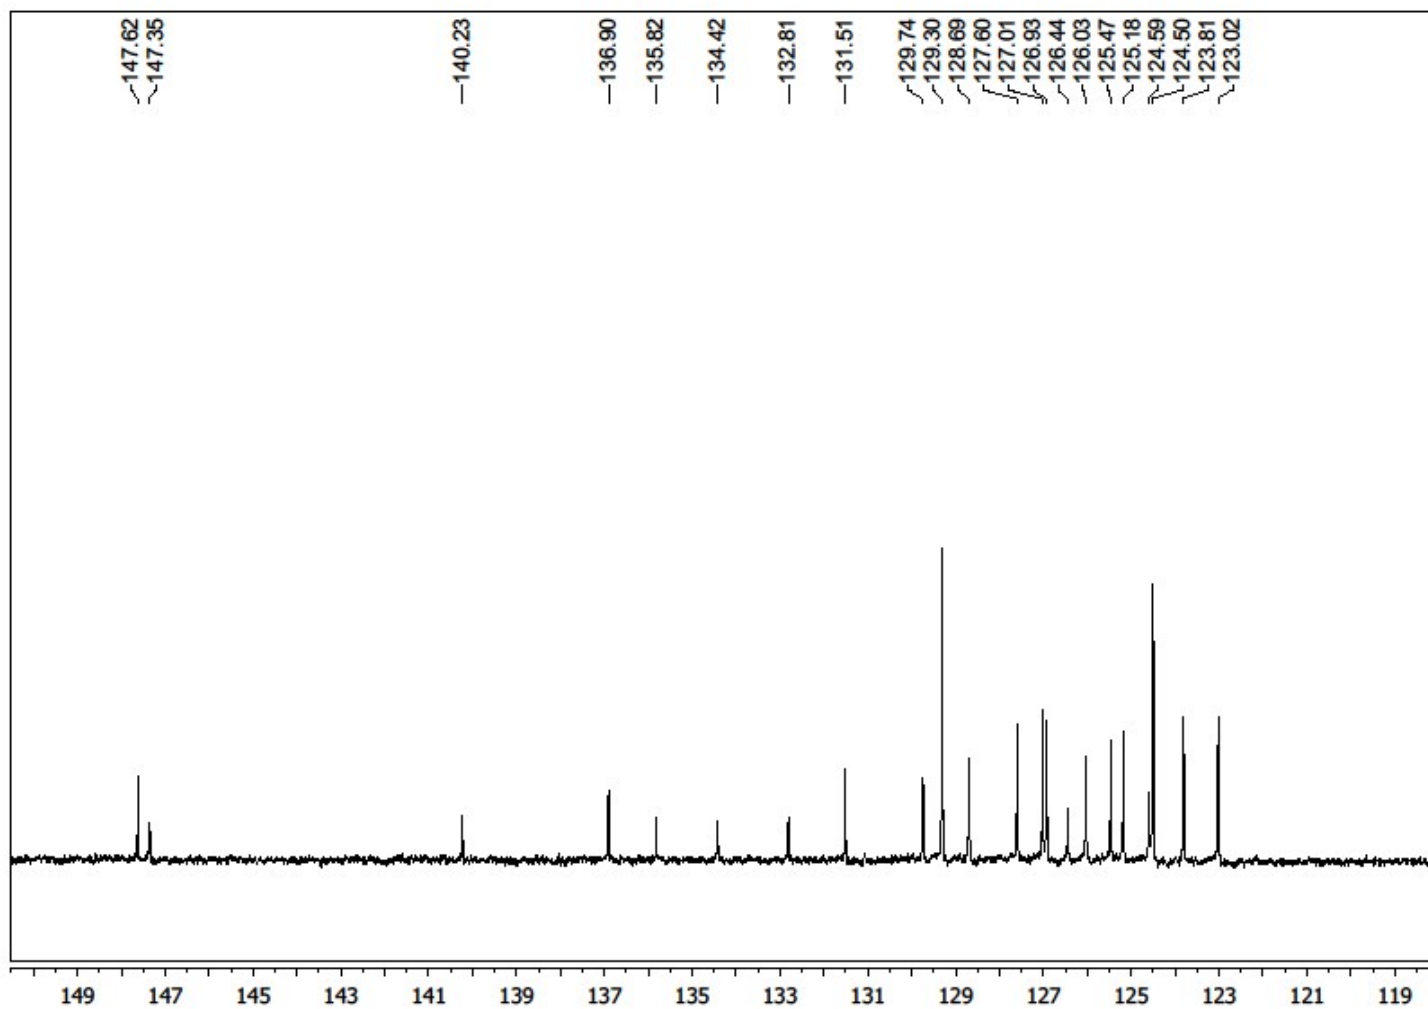

Figure S8. <sup>13</sup>C-NMR Spectrum of compound 8.

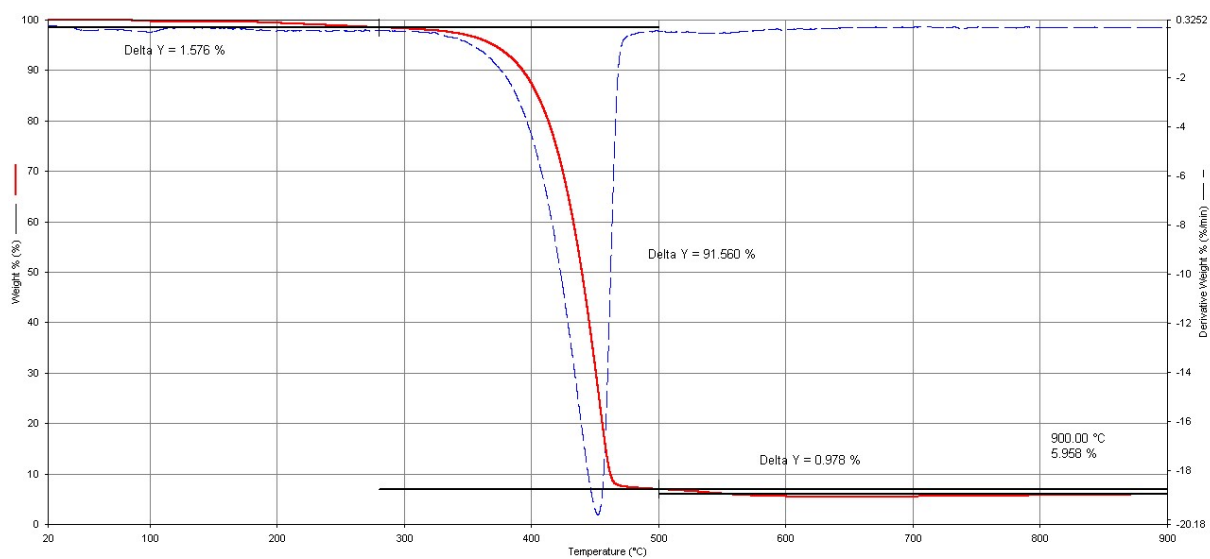

**Figure S9.** TGA thermogram of compound **7**.

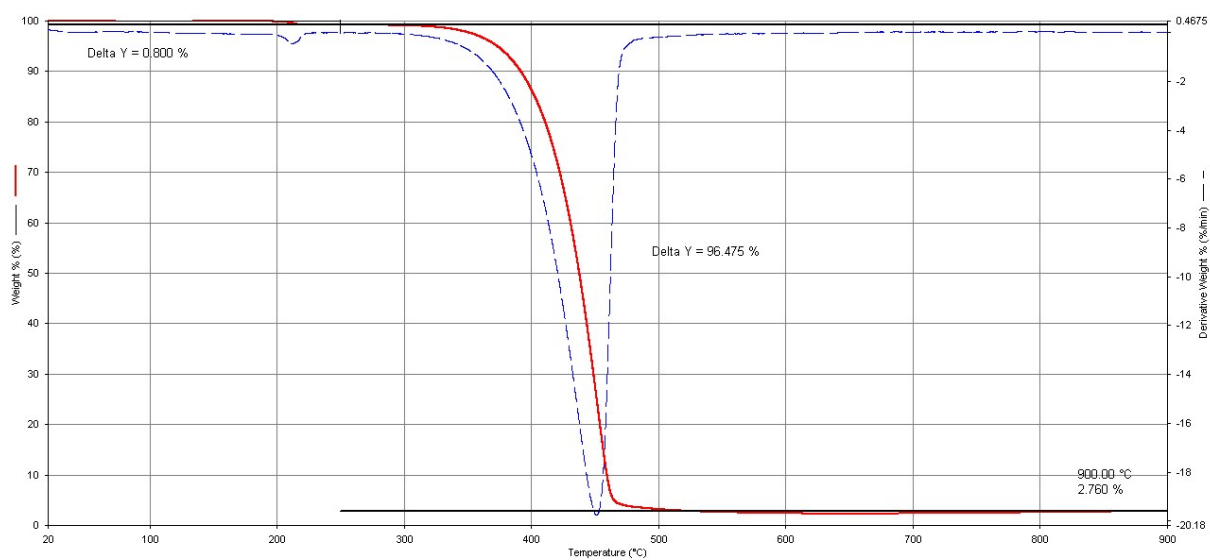

**Figure S10.** TGA thermogram of compound **8**.

File :C:\MSDCHEM\1\DATA\FIGEN\GH141-1.D  
Operator : NEVIN  
Acquired : 23 May 2019 15:59 using AcqMethod SOLVENT.M  
Instrument : Instrument #1  
Sample Name: GH141+ chcl3  
Misc Info : Direkt  
Vial Number: 1

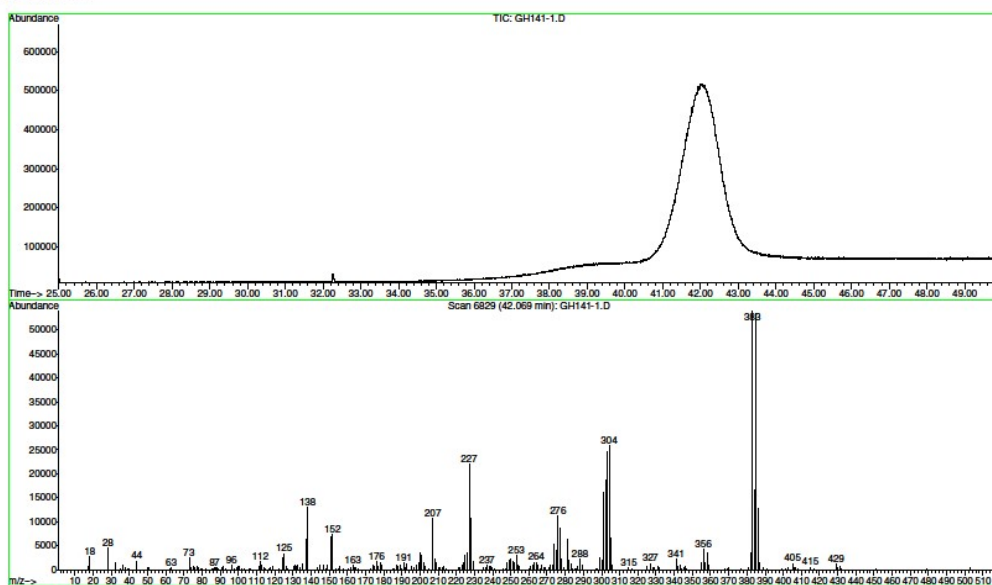

Figure S11. GC-MS chromatogram of compound 4.

File :C:\MSDCHEM\1\DATA\FIGEN\GH228-TEMIZ-1.D  
Operator : NEVIN  
Acquired : 21 May 2019 14:41 using AcqMethod SOLVENT.M  
Instrument : Instrument #1  
Sample Name: GH228-TEMIZ+ chcl3  
Misc Info : Direkt  
Vial Number: 1

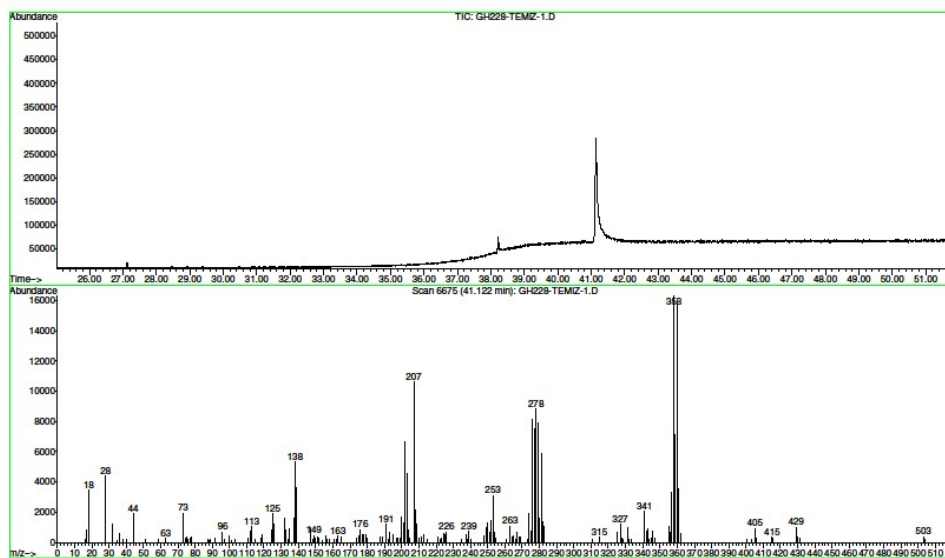

Figure S12. GC-MS chromatogram of compound 5.

### Compound Spectrum Report

|                      |                                  |                   |                      |
|----------------------|----------------------------------|-------------------|----------------------|
| <b>Analysis Info</b> |                                  | Acquisition Date  | 6/10/2020 9:12:48 AM |
| Analysis Name        | D:\Data\Gulcin Haykir\GH 155_1.d | Operator          | BDAL@DE              |
| Method               | tune_low-deneme.m                | Instrument / Ser# | microTOF 10308       |
| Sample Name          | GH 155_1                         |                   |                      |
| Comment              | solvent DCM<br>ADD FA            |                   |                      |

|                              |            |                      |          |                  |           |
|------------------------------|------------|----------------------|----------|------------------|-----------|
| <b>Acquisition Parameter</b> |            |                      |          |                  |           |
| Source Type                  | ESI        | Ion Polarity         | Positive | Set Nebulizer    | 0.3 Bar   |
| Focus                        | Not active |                      |          | Set Dry Heater   | 180 °C    |
| Scan Begin                   | 50 m/z     | Set Capillary        | 4500 V   | Set Dry Gas      | 4.0 l/min |
| Scan End                     | 3000 m/z   | Set End Plate Offset | -500 V   | Set Divert Valve | Waste     |

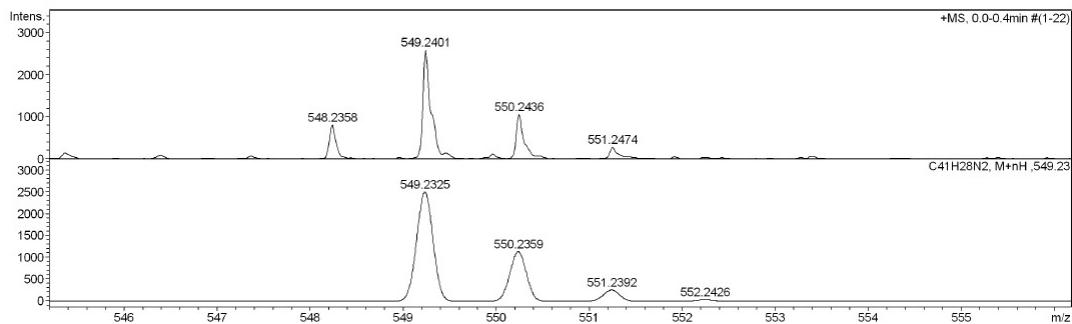

Figure S13. High Resolution Mass spectrum of compound 7.

### Compound Spectrum Report

|                      |                                    |                   |                      |
|----------------------|------------------------------------|-------------------|----------------------|
| <b>Analysis Info</b> |                                    | Acquisition Date  | 11/7/2017 3:12:48 PM |
| Analysis Name        | D:\Data\Gulcin Haykir\GH190_HRMS.d | Operator          | BDAL@DE              |
| Method               | tune_low.m                         | Instrument / Ser# | microTOF 10308       |
| Sample Name          | GH190_HRMS                         |                   |                      |
| Comment              |                                    |                   |                      |

|                              |            |                      |          |                  |           |
|------------------------------|------------|----------------------|----------|------------------|-----------|
| <b>Acquisition Parameter</b> |            |                      |          |                  |           |
| Source Type                  | ESI        | Ion Polarity         | Positive | Set Nebulizer    | 0.3 Bar   |
| Focus                        | Not active |                      |          | Set Dry Heater   | 180 °C    |
| Scan Begin                   | 50 m/z     | Set Capillary        | 4500 V   | Set Dry Gas      | 2.5 l/min |
| Scan End                     | 3000 m/z   | Set End Plate Offset | -500 V   | Set Divert Valve | Waste     |

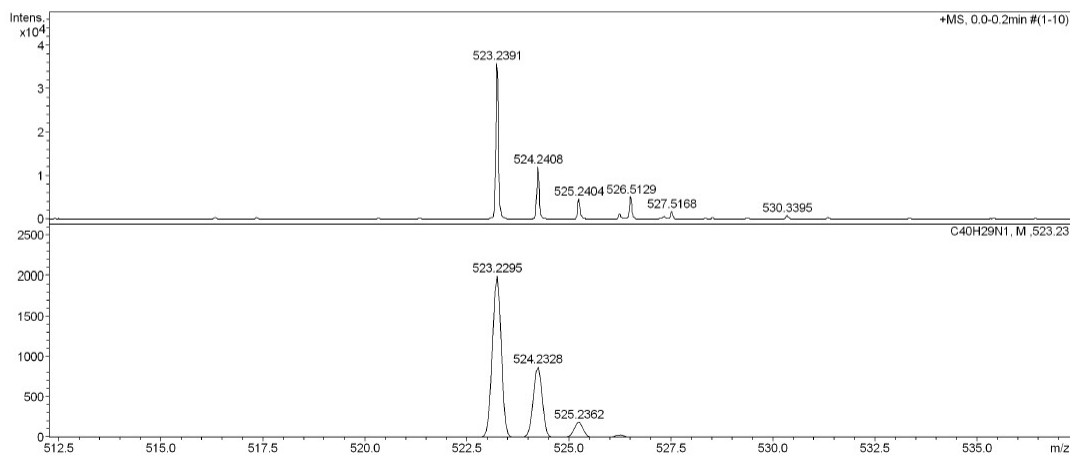

Figure S14. High Resolution Mass spectrum of compound 8.

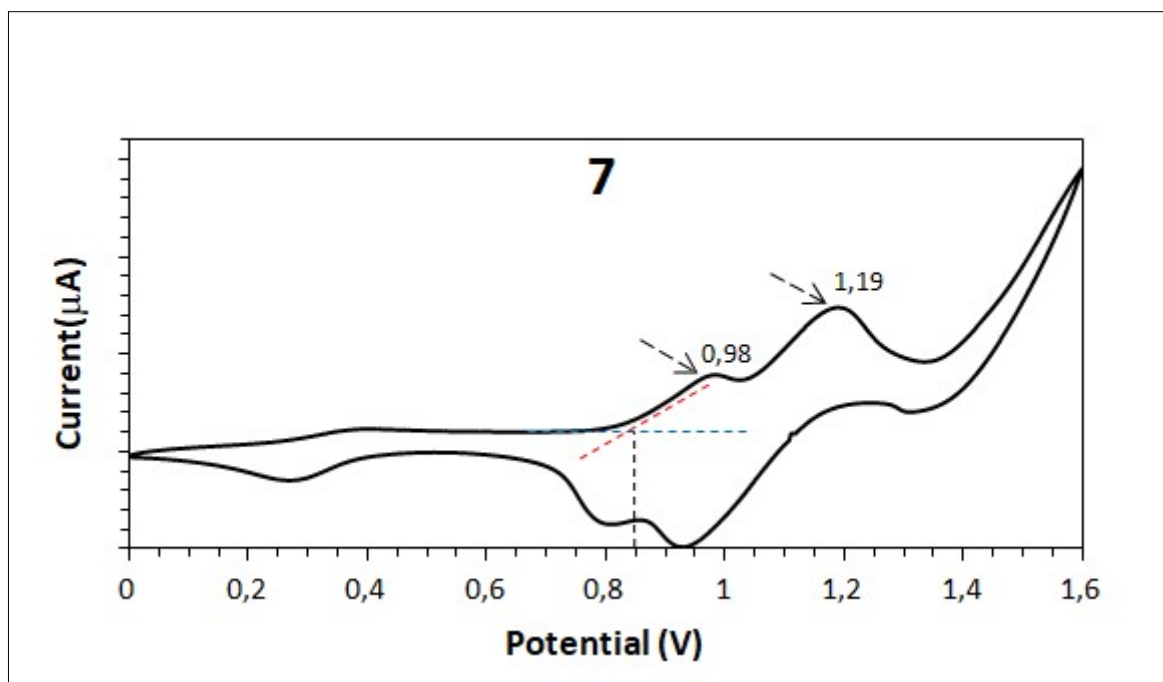

Figure S15. Electrochemical characterization of compound 7.

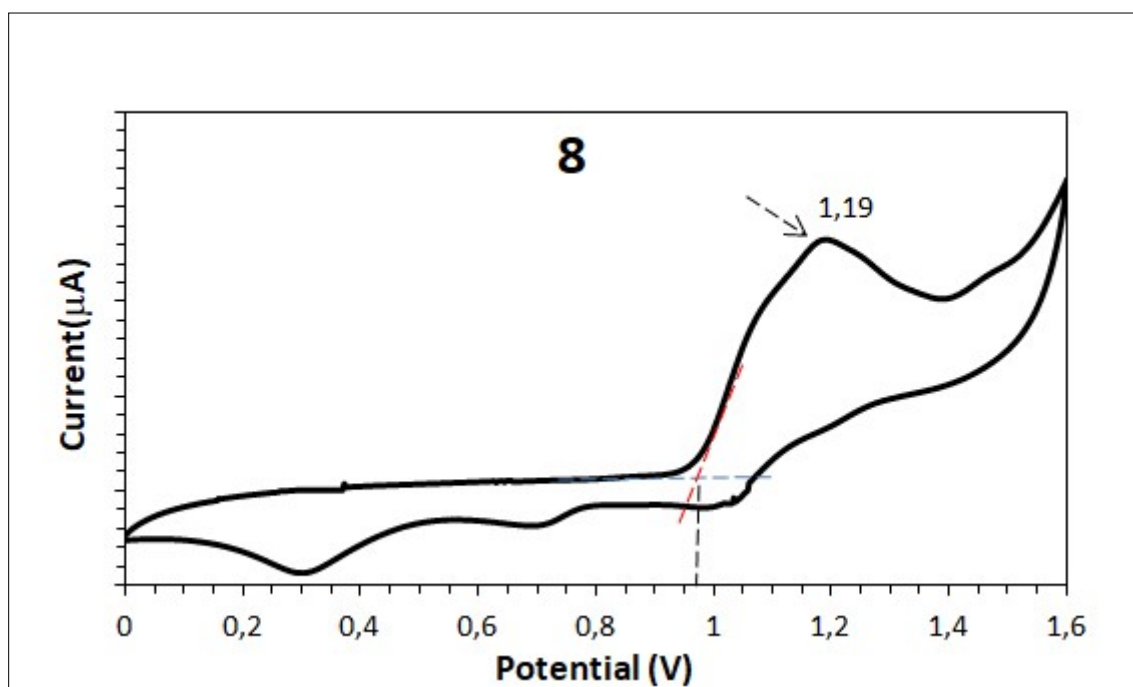

Figure S16. Electrochemical characterization of compound 8.
